# Supplementary material
Source: HighWire-hosted journal article supplement (https://bjo.bmj.com/content/bjophthalmol-2019-314429)
Supplement: inline-supplementary-material-1 [file inline-supplementary-material-1.pdf]

## Supplemental material

eTable 1. Demographics of prematurely born individuals from the 10-year follow-up<sup>12</sup> who attended and those who did not attend the 25-year follow-up study

|                                         | Attended  | Did not attend | p-value |
|-----------------------------------------|-----------|----------------|---------|
|                                         | 58/216    | 158/216        |         |
| GA (weeks)                              | 29.3      | 29.1           | ns      |
| BW (grams)                              | 1169      | 1166           | ns      |
| Female gender                           | 37 (64%)  | 74 (47%)       | 0.02    |
| Previous ROP                            | 24 (41%)  | 61 (39%)       | ns      |
| Previously treated for ROP              | 13 (22%)  | 12 (8%)        | 0.004   |
| Neurological complications at 2.5 years | 8 (14%)   | 24 (15%)       | ns      |
| Mean logMAR VA at 10 years              | RE -0.03  | RE -0.02       | ns      |
|                                         | LE: -0.03 | LE -0.01       | ns      |

BW=birth weight, GA=gestational age, LE=left eye, ns=non-significant, RE=right eye, ROP=retinopathy of prematurity, VA=visual acuity.
